# Supplementary material
Source: publisher figshare collection journal article supplement (https://frontiersin.figshare.com/ndownloader/files/32593598)
Supplement: Supplementary file [file 32593598]

## *Supplementary Material*

*Supplementary Table 1. Correlations between NETs markers and leukocyte count*

|                        |               | <b>dsDNA</b> | <b>MPO-DNA</b> | <b>H3Cit</b>     | <b>PAD4</b>  | <b>PAD4 mRNA</b> |
|------------------------|---------------|--------------|----------------|------------------|--------------|------------------|
| <b>Leukocyte count</b> | T1DM group    | 0.178        | -0.030         | <b>0.365</b>     | 0.211        | 0.165            |
|                        | p             | 0.074        | 0.768          | <b>&lt;0.001</b> | 0.052        | 0.104            |
|                        | Control group | <b>0.361</b> | <b>0.311</b>   | <b>0.344</b>     | <b>0.379</b> | -0.033           |
|                        | p             | <b>0.002</b> | <b>0.008</b>   | <b>0.003</b>     | <b>0.001</b> | 0.790            |

Spearman's rank correlation coefficient (r). T1DM, type 1 diabetes mellitus; dsDNA, double-stranded deoxyribonucleic acid; MPO-DNA, myeloperoxidase-DNA; H3Cit, citrullinated histone 3; PAD4, peptidylarginine deiminase 4.

### Figure Legends

#### *Supplementary Figure 1- NETs marker levels according to HbA1c quartiles in T1DM*

Boxplot The line inside the boxes represent the median, the box boundaries the 25<sup>th</sup> and 75<sup>th</sup> percentiles, while the lower and upper lines represent the 10<sup>th</sup> and 90<sup>th</sup> percentiles. T1DM, type 1 diabetes mellitus; HbA1c, glycated hemoglobin; dsDNA, double-stranded deoxyribonucleic acid; MPO-DNA, myeloperoxidase-DNA; H3Cit, citrullinated histone 3; PAD4, peptidylarginine deiminase 4.

#### *Supplementary Figure 2. Correlations between CCS and markers of NETs in T1DM*

Spearman's rank correlation coefficient (r) and scatter graphs with trend line showing relations between circulating markers of NETs. dsDNA, double-stranded deoxyribonucleic acid; MPO-DNA, myeloperoxidase-DNA; H3Cit, citrullinated histone 3; PAD4, peptidylarginine deiminase 4.

#### *Supplementary Figure 3. Correlations between circulating PAD4 and other circulating markers of NETs in both groups together*

Spearman's rank correlation coefficient (r) and scatter graphs with trend line showing relations between circulating markers of NETs. dsDNA, double-stranded deoxyribonucleic

acid; MPO-DNA, myeloperoxidase-DNA; H3Cit, citrullinated histone 3; PAD4, peptidylarginine deiminase 4.
